# Supplementary material
Source: Springer Nature journal article supplement (https://www.springermedizin.de/resource/supplementary/12913_2007_717_MOESM1_ESM.pdf/9535384)
Supplement: MOESM1 [file 9535384]

**Hospital event**

**RAC event**

**Type of concordance**

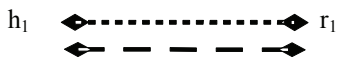

A Same link under E and N linkage: *hospital event  $h_1$  links to RAC event  $r_1$  under both E and N linkage.*

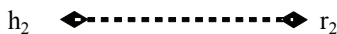

B N link only: *hospital event  $h_2$  links to RAC event  $r_2$  under N linkage only.*

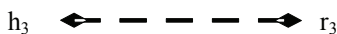

C E link only: *hospital event  $h_3$  links to RAC event  $r_3$  under E linkage only.*

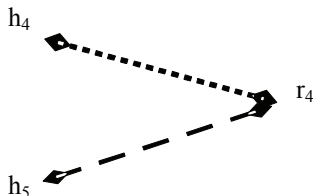

D Different hospital events linking to a RAC event under E and N linkage: *hospital event  $h_4$  links to RAC event  $r_4$  under N linkage, but hospital event  $h_5$  links to RAC event  $r_4$  under E linkage.*

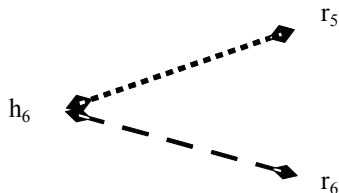

E Different RAC events linking to a hospital event under E and N linkage: *hospital event  $h_6$  links to RAC event  $r_5$  under N linkage, but to RAC event  $r_6$  under E linkage.*

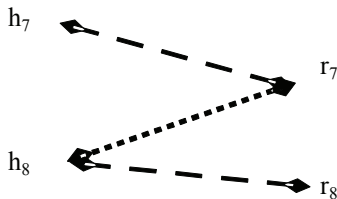

F Multiple mixed linking: *hospital event  $h_7$  links to RAC event  $r_7$  under N linkage, and hospital event  $h_8$  links to RAC event  $r_8$  under N linkage, but hospital event  $h_8$  links to RAC event  $r_7$  under E linkage.*

Legend:

$h_i$    $r_k$  N link between hospital event  $h_i$  and RAC event  $r_k$

$h_s$    $r_t$  E link between hospital event  $h_s$  and RAC event  $r_t$
